# Supplementary material for: Expert Panel Guidance and Narrative Review of Treatment Simplification of Complex Insulin Regimens to Improve Outcomes in Type 2 Diabetes
Source: Springer Nature journal article supplement (doi:10.1007/s13300-022-01222-2), 2022-03-11
Supplement: MOESM1 [file 20210956]

## **Supplementary material**

### **Expert panel guidance and narrative review of treatment simplification of complex insulin regimens to improve outcomes in type 2 diabetes**

Edward B. Jude<sup>1</sup>, Maciej T. Malecki<sup>2</sup>, Ricardo Gomez Huelgas<sup>3</sup>, Martin Prazny<sup>4</sup>, Frank Snoek<sup>5</sup>, Tsvetalina Tankova<sup>6</sup>, Dario Giugliano<sup>7</sup>, Kamlesh Khunti<sup>8</sup>

1. Tameside and Glossop Integrated Care NHS Foundation Trust, Ashton-under-Lyne and University of Manchester, United Kingdom
2. Department of Metabolic Diseases, Jagiellonian University Medical College, Krakow, Poland
3. Internal Medicine Department, Regional University Hospital of Málaga, Málaga, Spain. Instituto de Investigación Biomédica de Málaga (IBIMA), University of Málaga, Málaga, Spain. CIBER Fisiopatología de la Obesidad y la Nutrición (CIBEROBN), Instituto de Salud Carlos III, Madrid, Spain
4. 3rd Department of Internal Medicine, 1st Faculty of Medicine, Charles University, Prague, Czech Republic
5. Department of Medical Psychology, Amsterdam University Medical Center, Vrije Universiteit, Amsterdam, the Netherlands
6. Department of Endocrinology, Medical University – Sofia, Sofia, Bulgaria
7. Division of Endocrinology and Metabolic Diseases, University Hospital, Università della Campania Luigi Vanvitelli, Naples, Italy
8. Diabetes Research Centre, University of Leicester, Leicester, United Kingdom

#### **Corresponding author:**

Kamlesh Khunti

Diabetes Research Centre,

University of Leicester,

Leicester,

United Kingdom

Email: [kk22@leicester.ac.uk](mailto:kk22@leicester.ac.uk)

### Profile 1:

This individual was initially treated with OADs for 4 years. His treatment was then changed to basal insulin, as his HbA<sub>1c</sub> was not controlled sufficiently with OADs. Treatment was further intensified to twice daily premixed insulin 3 years later. He takes multiple medications due to comorbidities, which may negatively impact his adherence and lead to poor glycaemic control

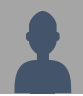

#### Clinical characteristics:

- Age: 71 years
- T2D: for 9 years
- HbA<sub>1c</sub>: 8.0%
- FPG: 266 mg/dL (14.8 mmol/L)
- BMI 31.9 kg/m<sup>2</sup>
- SBP: 145 mmHg
- DBP: 85 mmHg
- eGFR: 91.8 mL/min/1.73m<sup>2</sup>

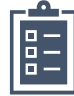

#### Disease history/comorbidities:

- Periodically moderate hypoglycaemic episodes
- Diabetic retinopathy
- History of promyelocytic leukaemia (17 years prior)
- Myocardial infarction (6 years prior)
- Arterial hypertension
- Hypercholesterolaemia

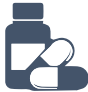

#### Current medication:

- Premix insulin 30/70 30-0-26
- Empagliflozin 25 mg at lunch
- ACEi
- Atorvastatin

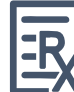

#### Recommendation:

Simplify treatment to an FRC. This will reduce the number of daily injections and the likelihood of hypoglycaemia, thereby decreasing the treatment burden

### Profile 2:

This man was initially prescribed OADs, which were replaced with basal-bolus insulin after 4 years. He exhibits mild cognitive impairment, characterised by memory problems and difficulties planning. He has also been diagnosed with depression and generalised anxiety disorder. He struggles to keep to his recommended diet and cannot undertake exercise due to mobility issues. He experiences low self-esteem due to weight gain, poor glycaemic control and struggles with self-monitoring of blood glucose. He does not have any immediate family for support

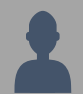

#### Clinical characteristics:

- Age: 56 years
- T2D: for 14 years
- HbA<sub>1c</sub>: 8.9%
- FPG: 225mg/dL (12.5 mmol/L)
- BMI: 34.2 kg/m<sup>2</sup>
- SBP: 149 mmHg
- DBP: 72 mmHg
- eGFR: 46.8 mL/min/1.73m<sup>2</sup>

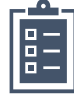

#### Disease history/comorbidities:

- Obesity
- Hypertension
- Depression
- Generalised anxiety disorder
- Stage 3a renal disease

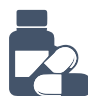

#### Current medication:

- Metformin (2 g/day)
- Insulin glargine (80 IU)
- Human insulin (20-20-20 IU)

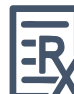

#### Recommendation:

Stop prandial insulin, maintain metformin and an FRC. This may prevent further weight gain and potentially aid weight loss, as well as improve his emotional wellbeing and QoL. A second generation basal insulin analogue should be used since they offer an improved hypoglycaemia safety profile

### Profile 3:

This woman has micro- and macrovascular complications, a history of falls and limited mobility. A nurse visits her daily to assist with her care. She has irregular food intake, putting her at risk of hypoglycaemia. Her comorbidities mean she has a limited life expectancy and is unlikely to reap the benefits of long-term intensive diabetes treatment

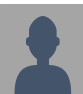

#### Clinical characteristics:

- Age: 83 years
- T2D: for 10 years
- HbA<sub>1c</sub>: 7.2%
- FPG level: 180 mg/dL (10 mmol/L)
- BMI: 28 kg/m<sup>2</sup>
- SBP: 145 mmHg
- DBP: 70 mmHg
- eGFR: 50 mL/min/1.73m<sup>2</sup>

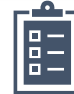

#### Disease history/comorbidities:

- Ischaemic stroke
- Metastatised melanoma
- Stage 3a renal disease
- CHD

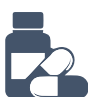

#### Current medication:

- Premix insulin 30/70 15-0-0
- Premix insulin 50/50 0-10-10
- Dapagliflozin

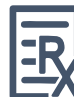

#### Recommendation:

Switch from 3 daily premixed insulin injections to a single dose of basal insulin 20-0-0 IU, alongside continuation of dapagliflozin and initiation of low dose metformin. A reduced injection number will help improve QoL. Insulin administration and HbA<sub>1c</sub> monitoring can be overseen during the daily nursing visit

## Profile 4:

This supermarket worker, with a mostly sedentary role, has an inactive lifestyle. Initial treatment was metformin 1000 mg BID for 3 years, before the addition of glimepiride 4 mg. This was intensified further after 1 year to include sitagliptin 100 mg. During a viral infection with diarrhoea and vomiting 2 years later, basal-bolus insulin was added. Her current treatment plan impacts negatively on her daily life. She has experienced weight gain and hypoglycaemic episodes. In addition, she cannot always administer her injections conveniently during her working hours

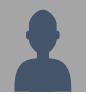

### Clinical characteristics:

- Age: 63 years
- T2D: for 13 years
- HbA<sub>1c</sub>: 8.7%
- FPG: 84.6 mg/dL (4.7 mmol/L)
- BMI: 29.7 kg/m<sup>2</sup>
- SBP: 145 mmHg
- DBP: 85 mmHg
- eGFR: 78 mL/min/1.73m<sup>2</sup>

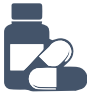

### Current medication:

- Metformin 1000 mg BID
- Insulin aspart before main meals (25–30 IU)
- Glargine (24 IU) at bedtime

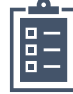

### Disease history/comorbidities:

- Non-proliferative diabetic retinopathy
- Stage 2 renal disease
- Albuminuria
- Peripheral diabetic neuropathy

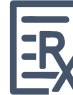

### Recommendation:

Switch to metformin + a basal analogue with a SGLT-2i. Tablets can be taken in the morning and at dinner, with a daily injection at bedtime, making it easier for therapy to fit into her daily routine. Closely follow-up and provide additional support through patient support groups, teleconsultations and training and support from a nurse

# SUPPLEMENTARY FIGURE 1: Profiles of individuals who may benefit from simplification

## Profile 1:

This individual was initially treated with OADs for 4 years. His treatment was then changed to basal insulin, as his HbA<sub>1c</sub> was not controlled sufficiently with OADs. Treatment was further intensified to twice daily premixed insulin 3 years later. He takes multiple medications due to comorbidities, which may negatively impact his adherence and lead to poor glycaemic control

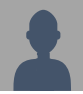

### Clinical characteristics:

- Age: 71 years
- T2D: for 9 years
- HbA<sub>1c</sub>: 8.0%
- FPG: 266 mg/dL (14.8 mmol/L)
- BMI 31.9 kg/m<sup>2</sup>
- SBP: 145 mmHg
- DBP: 85 mmHg
- eGFR: 91.8 mL/min/1.73m<sup>2</sup>

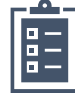

### Disease history/comorbidities:

- Periodically moderate hypoglycaemic episodes
- Diabetic retinopathy
- History of promyelocytic leukaemia (17 years prior)
- Myocardial infarction (6 years prior)
- Arterial hypertension
- Hypercholesterolaemia

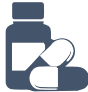

### Current medication:

- Premix insulin 30/70 30-0-26
- Empagliflozin 25 mg at lunch
- ACEi
- Atorvastatin

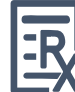

### Recommendation:

Simplify treatment to an FRC. This will reduce the number of daily injections and the likelihood of hypoglycaemia, thereby decreasing the treatment burden

## Profile 2:

This man was initially prescribed OADs, which were replaced with basal-bolus insulin after 4 years. He exhibits mild cognitive impairment, characterised by memory problems and difficulties planning. He has also been diagnosed with depression and generalised anxiety disorder. He struggles to keep to his recommended diet and cannot undertake exercise due to mobility issues. He experiences low self-esteem due to weight gain, poor glycaemic control and struggles with self-monitoring of blood glucose. He does not have any immediate family for support

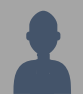

### Clinical characteristics:

- Age: 56 years
- T2D: for 14 years
- HbA<sub>1c</sub>: 8.9%
- FPG: 225 mg/dL (12.5 mmol/L)
- BMI: 34.2 kg/m<sup>2</sup>
- SBP: 149 mmHg
- DBP: 72 mmHg
- eGFR: 46.8 mL/min/1.73m<sup>2</sup>

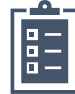

### Disease history/comorbidities:

- Obesity
- Hypertension
- Depression
- Generalised anxiety disorder
- Stage 3a renal disease

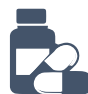

### Current medication:

- Metformin (2 g/day)
- Insulin glargine (80 IU)
- Human insulin (20-20-20 IU)

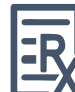

### Recommendation:

Stop prandial insulin, maintain metformin and an FRC. This may prevent further weight gain and potentially aid weight loss, as well as improve his emotional wellbeing and QoL. A second generation basal insulin analogue should be used since they offer an improved hypoglycaemia safety profile

## Profile 3:

This woman has micro- and macrovascular complications, a history of falls and limited mobility. A nurse visits her daily to assist with her care. She has irregular food intake, putting her at risk of hypoglycaemia. Her comorbidities mean she has a limited life expectancy and is unlikely to reap the benefits of long-term intensive diabetes treatment

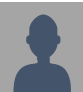

### Clinical characteristics:

- Age: 83 years
- T2D: for 10 years
- HbA<sub>1c</sub>: 7.2%
- FPG level: 180 mg/dL (10 mmol/L)
- BMI: 28 kg/m<sup>2</sup>
- SBP: 145 mmHg
- DBP: 70 mmHg
- eGFR: 50 mL/min/1.73m<sup>2</sup>

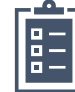

### Disease history/comorbidities:

- Ischaemic stroke
- Metastasised melanoma
- Stage 3a renal disease
- CHD

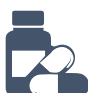

### Current medication:

- Premix insulin 30/70 15-0-0
- Premix insulin 50/50-10-10
- Dapagliflozin

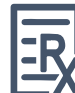

### Recommendation:

Switch from 3 daily premixed insulin injections to a single dose of basal insulin 20-0-0 IU, alongside continuation of dapagliflozin and initiation of low dose metformin. A reduced injection number will help improve QoL. Insulin administration and HbA<sub>1c</sub> monitoring can be overseen during the daily nursing visit

## Profile 4:

This supermarket worker, with a mostly sedentary role, has an inactive lifestyle. Initial treatment was metformin 1000 mg BID for 3 years, before the addition of glimepiride 4 mg. This was intensified further after 1 year to include sitagliptin 100 mg. During a viral infection with diarrhoea and vomiting 2 years later, basal-bolus insulin was added. Her current treatment plan impacts negatively on her daily life. She has experienced weight gain and hypoglycaemic episodes. In addition, she cannot always administer her injections conveniently during her working hours

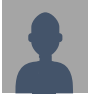

### Clinical characteristics:

- Age: 63 years
- T2D: for 13 years
- HbA<sub>1c</sub>: 8.7%
- FPG: 84.6 mg/dL (4.7 mmol/L)
- BMI: 29.7 kg/m<sup>2</sup>
- SBP: 145 mmHg
- DBP: 85 mmHg
- eGFR: 78 mL/min/1.73m<sup>2</sup>

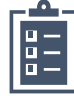

### Disease history/comorbidities:

- Non-proliferative diabetic retinopathy
- Stage 2 renal disease
- Albuminuria
- Peripheral diabetic neuropathy

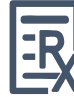

### Recommendation:

Switch to metformin + a basal analogue with a SGLT-2i. Tablets can be taken in the morning and at dinner, with a daily injection at bedtime, making it easier for therapy to fit into her daily routine. Closely follow-up and provide additional support through patient support groups, teleconsultations and training and support from a nurse

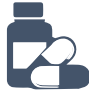

### Current medication:

- Metformin 1000 mg BID
- Insulin aspart before main meals (25–30 IU)
- Glargine (24 IU) at bedtime

ACEi, angiotensin converting enzyme inhibitor; BID, twice daily; BMI, body mass index; CHD, coronary heart disease; DBP, diastolic blood pressure; DPP4i, dipeptidyl peptidase-4 inhibitor; eGFR, estimated glomerular filtration rate; FPG, fasting plasma glucose; FRC, fixed ratio combination; GLP-1 RA, glucagon-like peptide-1 receptor agonist; HbA<sub>1c</sub>, glycated haemoglobin; IU, insulin unit; OAD, oral anti-diabetic; QoL, quality of life; SBP, systolic blood pressure; SGLT-2i, sodium-glucose co-transporter-2 inhibitor; T2D, type 2 diabetes; TID, three times daily.
